# Supplementary material for: Optimized Clump Culture Methods for Adult Human Multipotent Neural Cells
Source: PubMed Central journal article supplement (PMC6274905; doi:10.3390/ijms19113380), 2018-10-29
Supplement: ijms-19-03380-s001.pdf [file ijms-19-03380-s001.pdf]

Supplementary Table 1. Clinical information of patients

| Patients                      | <b>NS18-007TL</b>       | <b>NS18-008TL</b>     |
|-------------------------------|-------------------------|-----------------------|
| Age at surgery                | 33                      | 25                    |
| Sex                           | Female                  | Male                  |
| Seizure duration, years       | 16                      | 12                    |
| Seizure frequency per months  | 1-2                     | 4                     |
| Side of the brain             | Left                    | Right                 |
| Perfusion on interictal SPECT | Mild hypoperfusion      | Mild hypoperfusion    |
| Hypometabolism on PET         | Moderate hypometabolism | Mild hypometabolism   |
| Intelligent quotient          | 81                      | 80                    |
| Pathological diagnosis        | Hippocampal sclerosis   | Hippocampal sclerosis |

\* SPET: single photon emission tomography, PET: position emission tomography
